# Supplementary material for: Novel NFκB Inhibitor SC75741 Mitigates Chondrocyte Degradation and Prevents Activated Fibroblast Transformation by Modulating miR-21/GDF-5/SOX5 Signaling
Source: MDPI journal article supplement (doi:10.3390/ijms222011082), 2021-10-14
Supplement: s1 [file s1]

## SUPPLEMENTARY INFORMATION

Novel NF $\kappa$ B Inhibitor SC75741 Mitigates Chondrocyte Degradation and Prevents Activated Fibroblast Transformation by Modulating miR-21/GDF-5/SOX5 Signaling

Pei-Wei Weng <sup>1,2,3</sup>, Vijesh Kumar Yadav <sup>4</sup>, Narpati Wesa Pikatan <sup>4</sup>, Iat-Hang Fong <sup>4</sup>, I-Hsin Lin <sup>5,6\*</sup>, Chi-Tai Yeh <sup>4,7</sup> and Wei-Hwa Lee <sup>4,8\*</sup>

<sup>1</sup> Department of Orthopaedics, School of Medicine, College of Medicine, Taipei Medical University, Taipei City 110, Taiwan.

<sup>2</sup> Department of Orthopaedics, Shuang Ho Hospital, Taipei Medical University, New Taipei City 23561, Taiwan.

<sup>3</sup> Graduate Institute of Biomedical Materials and Tissue Engineering, College of Biomedical Engineering, Taipei Medical University, Taipei City 110, Taiwan.

<sup>4</sup> Department of Medical Research & Education, Taipei Medical University - Shuang Ho Hospital, New Taipei City 23561, Taiwan.

<sup>5</sup> School of Dentistry, College of Oral Medicine, Taipei Medical University, Taipei City 110, Taiwan.

<sup>6</sup> Division of Periodontics, Department of Dentistry, Taipei Medical University - Shuang Ho Hospital, New Taipei City 23561, Taiwan.

<sup>7</sup> Department of Medical Laboratory Science and Biotechnology, Yuanpei University of Medical Technology, Hsinchu City 30015, Taiwan.

<sup>8</sup> Department of Pathology, Taipei Medical University-Shuang Ho Hospital, New Taipei City 23561, Taiwan.

\* Correspondence: author(s): I-Hsin Lin, MD, Division of Periodontics, Department of Dentistry, Taipei Medical University - Shuang Ho Hospital, New Taipei City 23561, Taiwan. Tel: +886-2-2490088 ext. 8881, Fax: +886-2-2248-0900. E-mail: [14198@s.tmu.edu.tw](mailto:14198@s.tmu.edu.tw) ; Wei-Hwa Lee, MD., Ph.D, Department of Pathology, Taipei Medical University-Shuang Ho Hospital, New Taipei City, Taiwan. Tel: +886-2-2490088 ext. 8885, Fax:886-3-5401480. E-mail: [whlpath97616@s.tmu.edu.tw](mailto:whlpath97616@s.tmu.edu.tw)

**Supplementary Table S1. Primer sequence in this study.**

| Gene   |         | sequence                |
|--------|---------|-------------------------|
| IL-6   | forward | AGACAGCCACTCACCTCTTCAG  |
|        | reverse | TTCTGCCAGTGCCTCTTTGCTG  |
| COX2   | forward | CGGTGAAACTCTGGCTAGACAG  |
|        | reverse | GCAAACCGTAGATGCTCAGGGA  |
| NFκB   | forward | GCAGCACTACTTCTTGACCACC  |
|        | reverse | TCTGCTCCTGAGCATTGACGTC  |
| TNF-α  | forward | CTCTTCTGCCTGCTGCACTTTG  |
|        | reverse | ATGGGCTACAGGCTTGTCACTC  |
| miR-21 | forward | ACGTTGTGTAGCTTATCAGACTG |
|        | reverse | AATGGTTGTTCTCCACACTCTC  |

**Supplementary Table S2. The membranes were incubated in primary antibodies**

| No. | Target         | Dilution |       |            | Source         |
|-----|----------------|----------|-------|------------|----------------|
| 1   | TNF- $\alpha$  | 1:1000   | 25    | #8184      | Cell Signaling |
| 2   | NF $\kappa$ B  | 1:1000   | 65    | #8242      | Cell Signaling |
| 3   | IL-6           | 1:1000   | 21-28 | #12153     | Cell Signaling |
| 4   | Cox-2          | 1:1000   | 74    | #12282     | Cell Signaling |
| 5   | COL4A1         | 1:1000   | 200   | #50273     | Cell Signaling |
| 6   | SOX5           | 1:1000   | 84    | ab94396    | Abcam          |
| 7   | GDF-5          | 1:1000   | 13    | ab166617   | Abcam          |
| 8   | TGF- $\beta$ 1 | 1:1000   | 44    | ab215715   | Abcam          |
| 9   | MMP9           | 1:1000   | 78    | ab76003    | Abcam          |
| 10  | RANKL          | 1:1000   | 35    | ab9957     | Abcam          |
| 11  | TRAP           | 1:1000   | 37    | ab52750    | Abcam          |
| 12  | OPG            | 1:1000   | 46    | ab73400    | Abcam          |
| 13  | $\alpha$ -SMA  | 1:1000   | 42    | ab7817     | Abcam          |
| 14  | ACAN           | 1:1000   | 200   | sc-33695   | santa cruz     |
| 15  | $\beta$ -actin | 1:10000  | 42    | 66009-1-Ig | proteintect    |

**C**

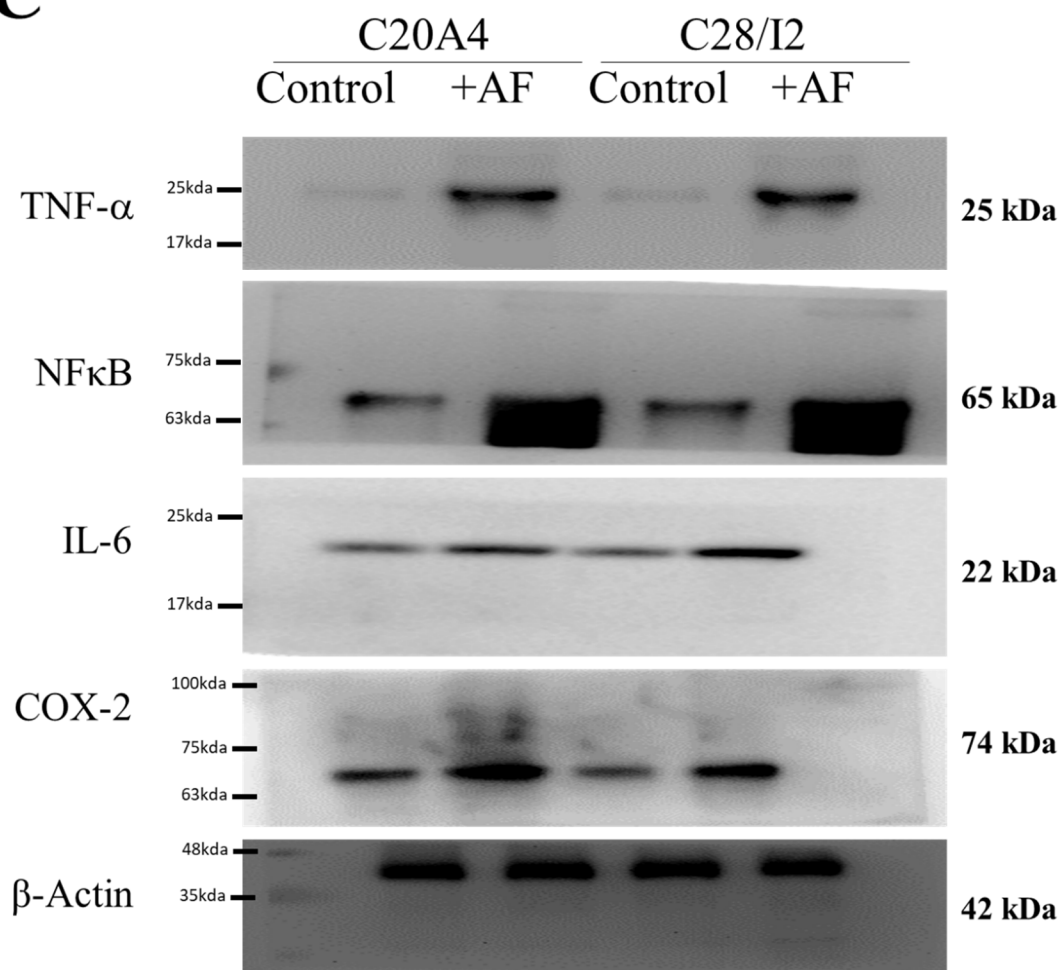

**Supplementary Figure S1. Full-size blots of Figure 1C**

**D****Activated chondrocytes**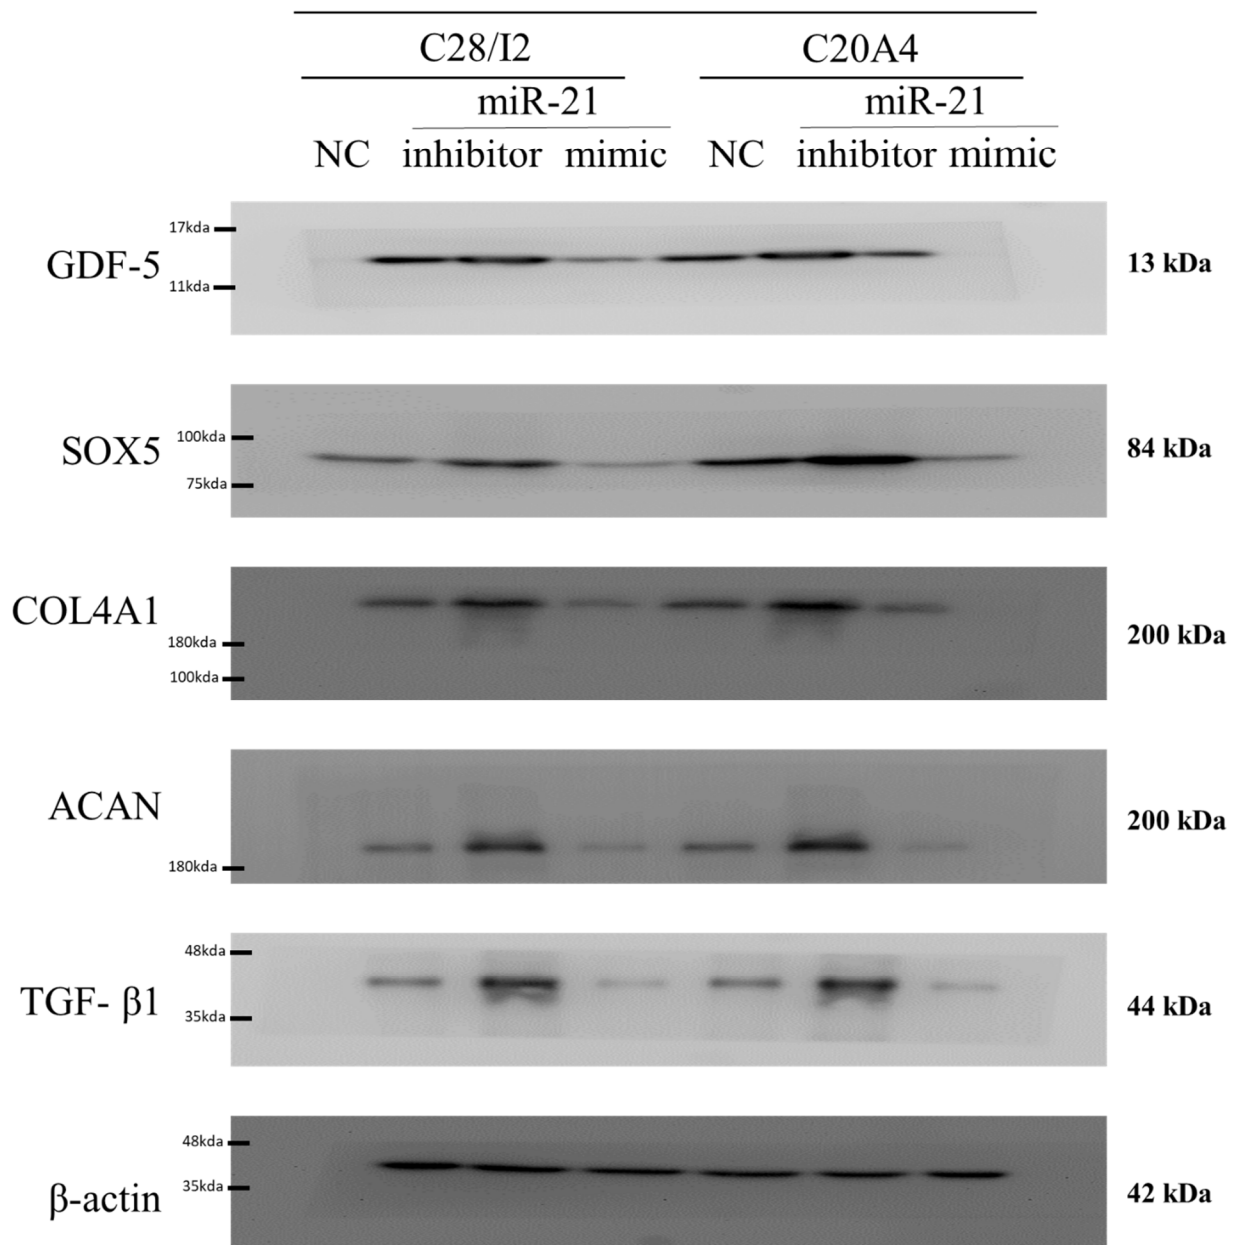**Supplementary Figure S2. Full-size blots of Figure 2D**

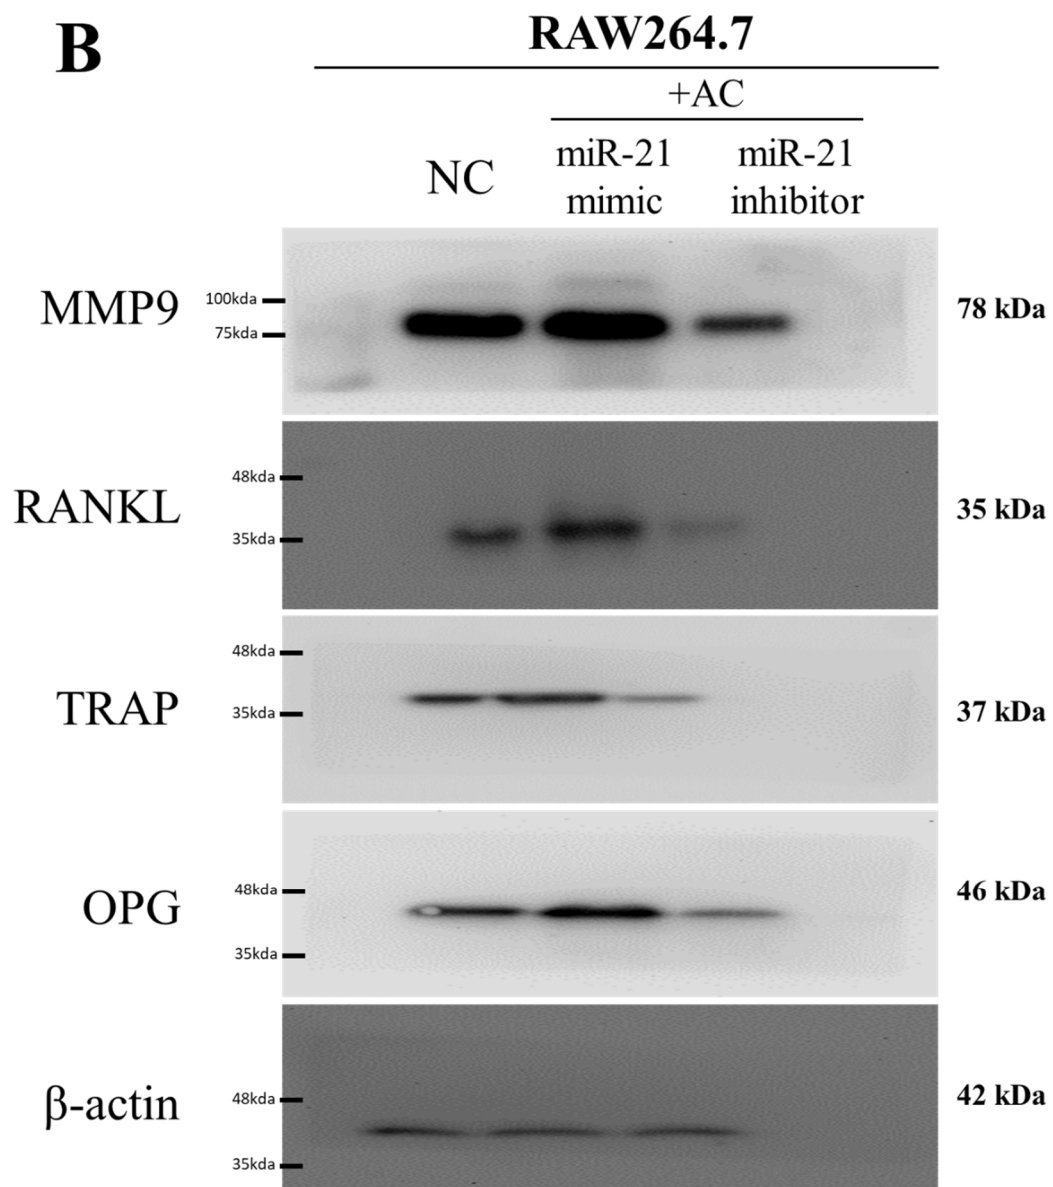

Supplementary Figure S3. Full-size blots of Figure 3B

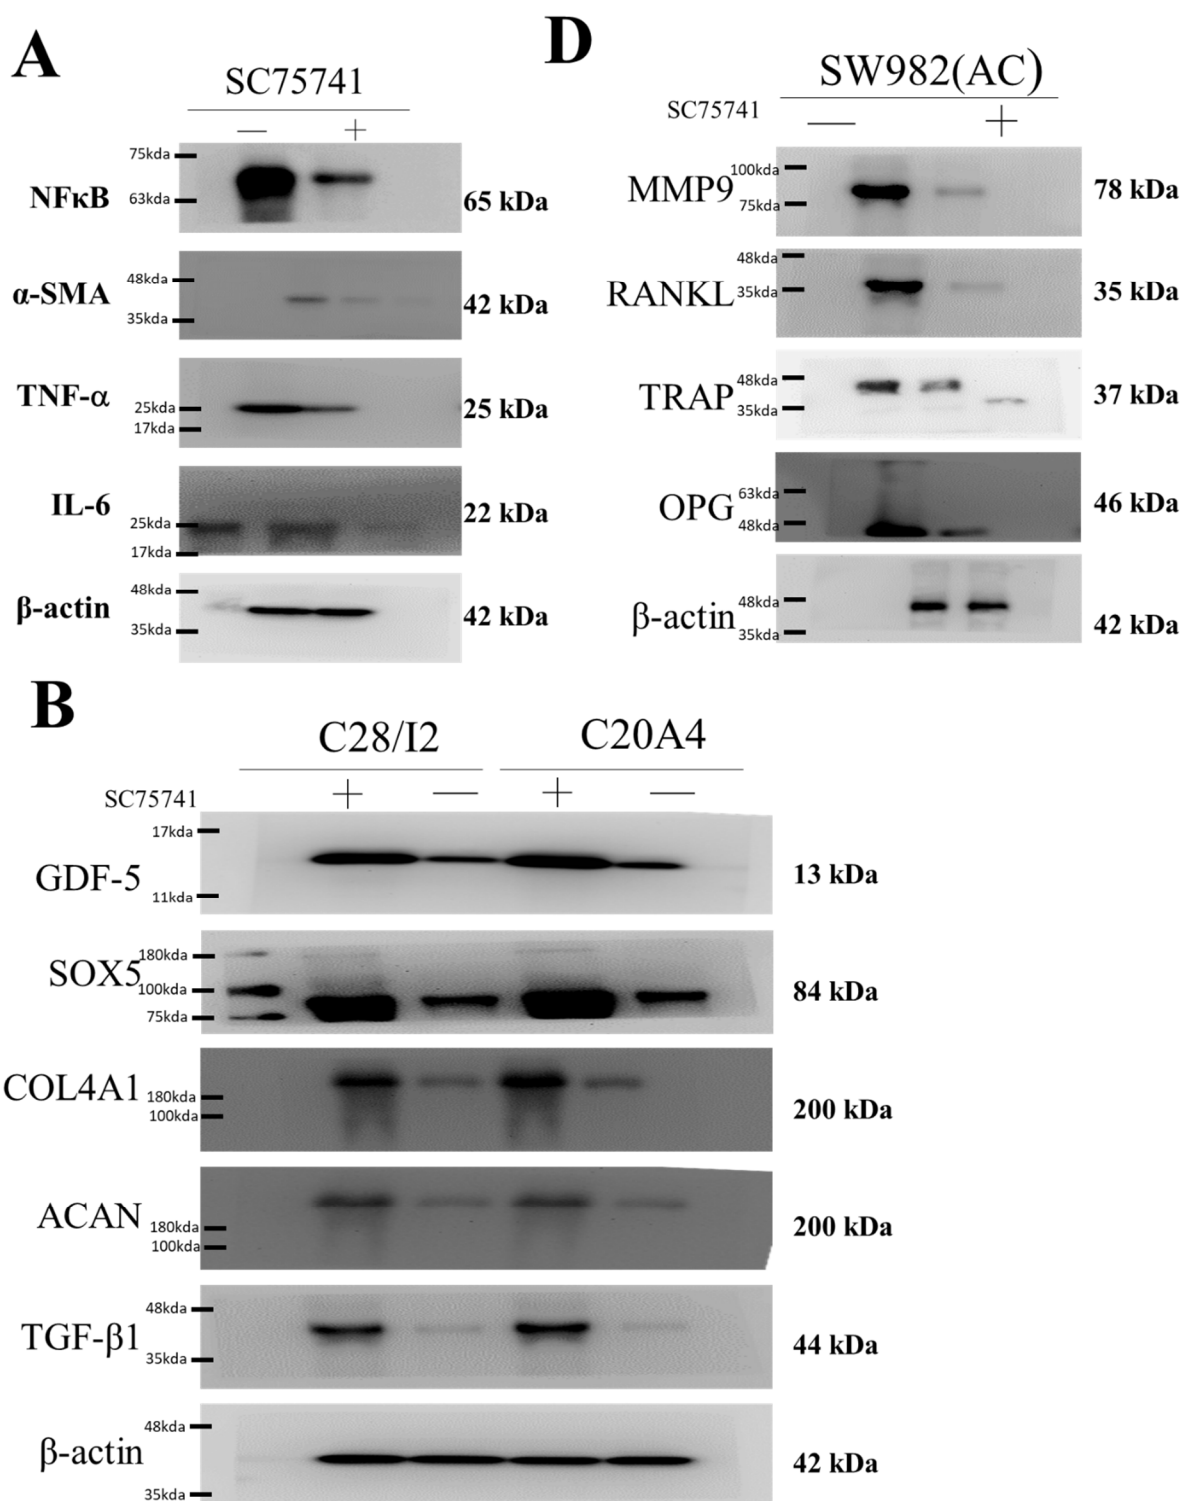

**Supplementary Figure S4. Full-size blots of Figure 4A, 4B and 4D**
